# Supplementary material for: Membrane fouling amelioration through pseudo dead-end filtration coupled with transmembrane pressure (TMP) set-point control in an anaerobic membrane bioreactor for municipal wastewater treatment
Source: Royal Society of Chemistry journal article supplement (doi:10.1039/d1ew00444a), 2021-01-01
Supplement: d1ew00444a1.pdf [file d1ew00444a1.pdf]

---

**Membrane fouling amelioration through a pseudo dead-end filtration coupled with transmembrane pressure (TMP) set-point control in anaerobic membrane bioreactor for municipal wastewater treatment**

K.M. Wang<sup>a</sup>, L.J. Zhang<sup>b</sup>, H.L. Zhang<sup>a</sup>, J.L. Li<sup>a</sup>, Y.C. Zhang<sup>a</sup>, B.C. Liu<sup>a</sup>, H.Y. Wang<sup>a\*</sup>

<sup>a</sup> College of Environment, Zhejiang University of Technology, Hangzhou, 310014, China

<sup>b</sup> College of Civil Engineering, Zhejiang University of Technology, Hangzhou, 310023, China

Email: [hywang@zjut.edu.cn](mailto:hywang@zjut.edu.cn)

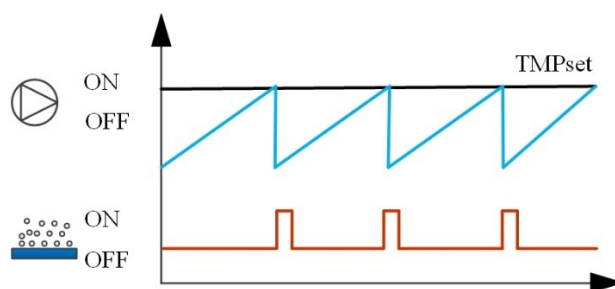

**Figure S1** Pseudo dead-end filtration coupled with transmembrane pressure (TMP) set-point control mode.

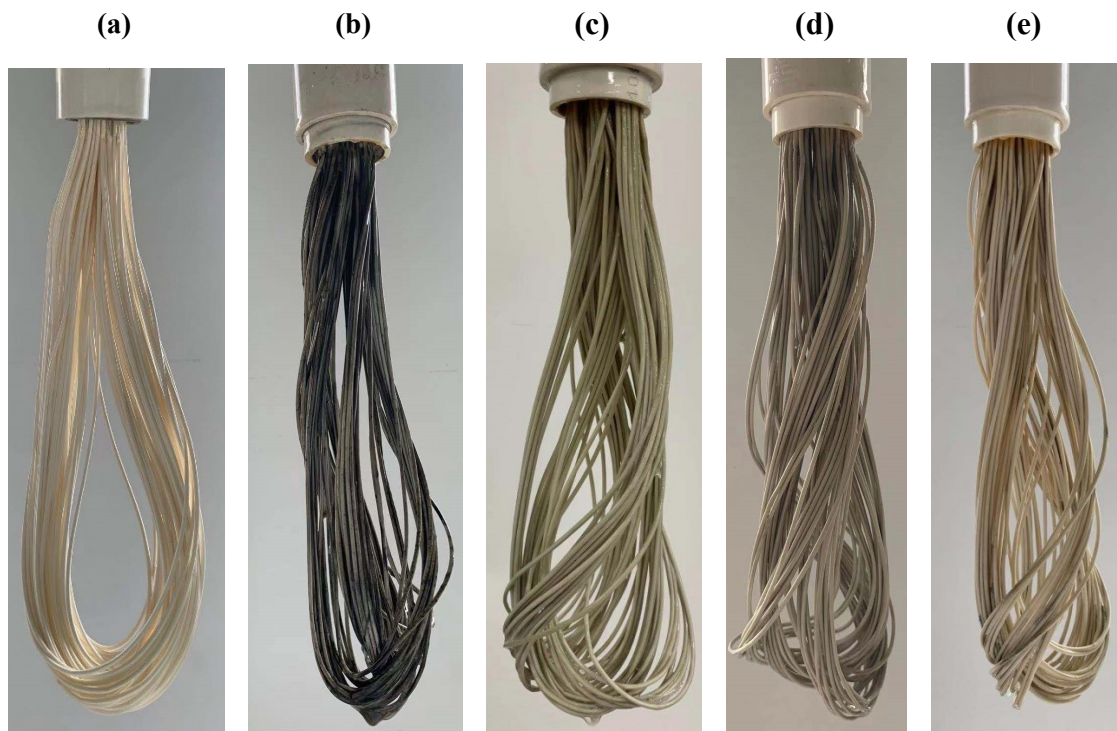

**Figure S2** Images of (a) clean membrane, (b) membrane operated under continuous filtration without gas sparging, (c) CGS (continuous filtration + continuous gas sparging), (d) DE (pseudo dead-end filtration), (e) DE coupled with  $TMP_{set}$  ( $TMP_{set}=10$  kPa). Detailed conditions can be referred to Table 2.

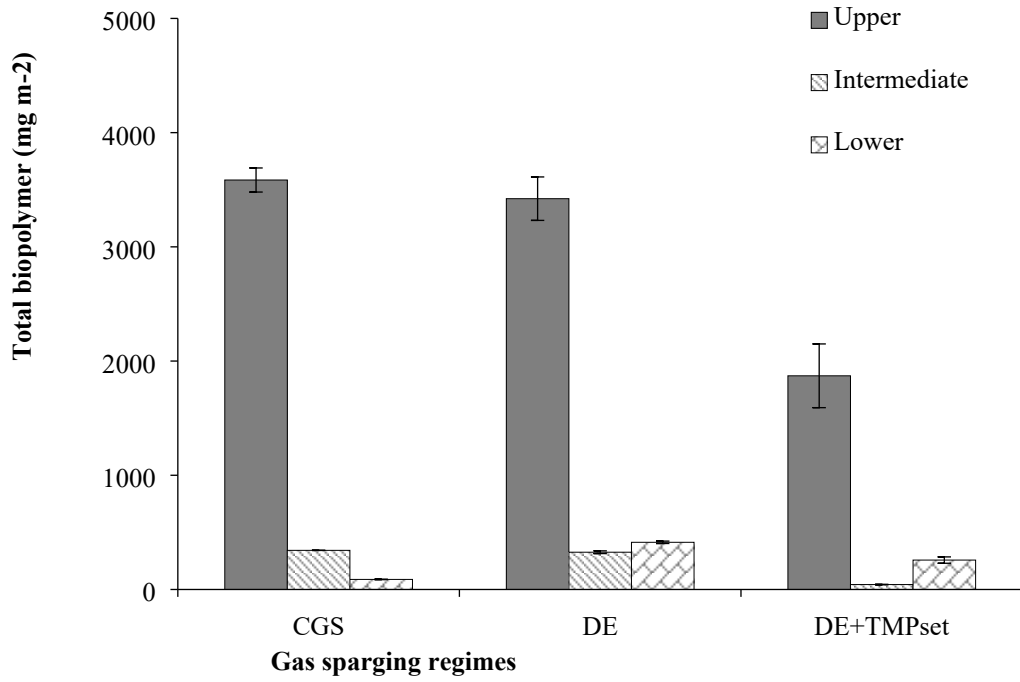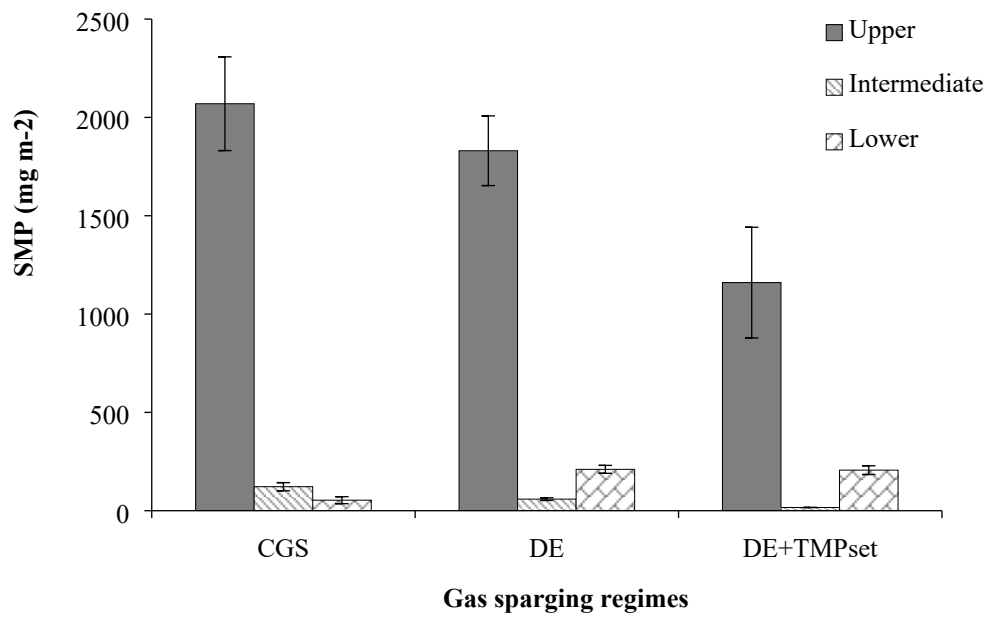

**Figure S3** Total biopolymer (TBP), soluble microbial products (SMP) of the fouling cake after 72 h operation under different gas sparging regimes. CGS (continuous filtration + continuous gas sparging); DE (pseudo dead-end filtration), TMPset (TMP set-point, TMPset=10 kPa).

**Table S1** Values of operational parameters used in cost assessment.

| Parameter              | Unit                           | Values              | Notes (Ref.)               |
|------------------------|--------------------------------|---------------------|----------------------------|
| Flow                   | m <sup>3</sup> d <sup>-1</sup> | 20000               |                            |
| Biogas sparging energy | kWh m <sup>-3</sup>            | 0.0162              | Calculated from this study |
| Permeate pump energy   | kWh m <sup>-3</sup>            | 0.0530              | Calculated from this study |
| Backwash pump energy   | kWh m <sup>-3</sup>            | 0.0232              | Calculated from this study |
| Electricity            | US\$ kWh <sup>-1</sup>         | 0.10                | [1]                        |
| Sludge treatment       | US\$ ton <sup>-1</sup>         | 200                 | [1]                        |
| MLVSS                  | kg MVLSS kg <sup>-1</sup> COD  | 0.0378              | [1]                        |
| Citric acid 50%        | US\$ kg <sup>-1</sup>          | 0.88 <sup>a</sup>   | [2,3]                      |
| NaClO 14%              | US\$ L <sup>-1</sup>           | 0.2946 <sup>b</sup> | [2,3]                      |

1€≈1.16\$

a. 0.76€/kg\*1.16=0.88\$/kg; b. 0.254€/L<sup>-1</sup>\*1.16=0.2946\$ L<sup>-1</sup>

### Reference:

- [1] H. Lin, J. Chen, F. Wang, L. Ding and H. Hong, Feasibility evaluation of submerged anaerobic membrane bioreactor for municipal secondary wastewater treatment, *Desalination*, 2011, **280**, 120–126.
- [2] B. Verrecht, T. Maere, I. Nopens, C. Brepols and S. Judd, The cost of a large-scale hollow fibre MBR, *Water Res.*, 2010, **44**, 5274–5283.
- [3] Alibaba. Chemical product price enquiry. [www.alibaba.com](http://www.alibaba.com), 2021.
